# Supplementary material
Source: PubMed Central journal article supplement (PMC4441318)
Supplement: 113.068437_ajcn068437SupplementaryData1.pdf [file 113.068437_ajcn068437SupplementaryData1.pdf]

## Online Supplemental Material

### Supplemental Methods: Intakes of Antioxidants and Magnesium

#### *Dietary Intakes from Food Consumption.*

Dietary  $\beta$ -carotene, vitamin C, vitamin E, and magnesium intakes were estimated on a 24-hour dietary recall (24-h DR) interview. DR interview includes a list of all foods and beverages consumed by the respondent except plain drinking water during the 24-hour period prior to the interview, amounts of the reported foods, and detailed food descriptions (1-3). Individuals with unreliable or incomplete DR records were excluded as recommended by the National Center for Health Statistics (4). In NHANES 2001, dietary intake data were collected using the NHANES computer-assisted dietary interview system (CADI), an automated data collection form using Power Builder™, and several databases (i.e., quick List food list, brand name food list, and food amount unit list) are linked to this system (2). From NHANES 2002 to 2004, data were collected using the US Department of Agriculture (USDA) Automated Multiple Pass method (AMPM) (<http://www.ars.usda.gov/ba/bhnrc/fsrg>), a fully computerized recall method that uses a 5-step interview (quick list, forgotten foods, time and occasion, detail cycle, and final probe) (2, 3, 5).

NHANES food consumption data were then converted to USDA standard reference code, and food intakes data were linked to their matched nutrient composition database. Coding process for food intakes was conducted by the University of Texas Food Intake Analysis System (FIAS, version 3.99) with the USDA 1994-98 Survey Nutrient Database in the NHANES 2001 [2] and by USDA's Food and Nutrient Database for Dietary Studies, 2.0

(FNDDS 2.0) in the NHANS 2002 to 2004 (2, 3). Daily individual intakes from selected food item were determined by multiplying the content of each nutrient by its daily consumption. Data on participants' daily dietary intakes were estimated as the sum of those from all food sources and available in the NHANES 2001-2004. Each dietary intake reported was adjusted for total energy intake, using the residual method (6).

### ***Nutrient Intakes from Food Consumption and Supplement Use.***

Participants were interviewed about their supplement use in NHANES 2001-2004.  $\beta$ -carotene, vitamin C, vitamin E, and magnesium intakes from the supplement sources were estimated using the supplement counts file and supplement use file on dietary supplements questionnaire data and supplement product information file (7, 8) and supplement ingredient information file available on dietary supplement database (9). Ingredients corresponding to each nutrient were selected from the supplement ingredient information and converted to elemental nutrients unit. Next, nutrient composition of supplements was obtained from the supplement product information. Individual nutrient intakes from the supplements were calculated using the supplements counts and use and supplement product information, and participants' daily intakes were computed as the sum of all supplement sources intakes. Estimated total nutrient intake was sum of food- and supplement-sources intakes (10).

**Supplemental Table 1.** General characteristics of study participants and non-participants (n=3608<sup>1</sup>)

| Characteristic                                | Included Participants <sup>2</sup><br>(N=2592) | Excluded Non-Participants<br>(N=1016) | P-value |
|-----------------------------------------------|------------------------------------------------|---------------------------------------|---------|
| Speech frequency PTA (dB) <sup>3</sup>        | 12.7 (± 0.35) <sup>4</sup>                     | 16.2 (± 0.53)                         | <0.001  |
| High frequency PTA (dB) <sup>5</sup>          | 18.8 (± 0.59)                                  | 23.1 (± 0.84)                         | <0.001  |
| Age (y)                                       | 42.1 (± 0.33)                                  | 41.3 (± 0.46)                         | 0.210   |
| Body Mass Index (kg/m <sup>2</sup> )          | 28.0 (± 0.14)                                  | 28.5 (± 0.39) <sup>6</sup>            | 0.195   |
| Noise exposures                               |                                                |                                       |         |
| Occupational noise <sup>7</sup> (O*NET score) | 3.1 (± 0.02)                                   | 3.1 (± 0.03) <sup>8</sup>             | 0.256   |
| Recreational noise (Exposed %)                | 27.5 <sup>9</sup>                              | 31.8 <sup>10</sup>                    | 0.056   |
| Firearm noise (Exposed %)                     | 7.8                                            | 8.5 <sup>11</sup>                     | 0.646   |
| Sex (Male %)                                  | 47.8                                           | 49.5                                  | 0.384   |
| Race ethnicity (%)                            |                                                |                                       |         |
| Non-Hispanic White                            | 73.0                                           | 66.4                                  | <0.001  |
| Non-Hispanic Black                            | 11.2                                           | 10.4                                  |         |
| Mexican American                              | 6.8                                            | 9.5                                   |         |
| Other                                         | 9.0                                            | 13.6                                  |         |
| Ototoxic medication (Current use %)           | 14.3                                           | 14.2 <sup>10</sup>                    | 0.935   |
| Cumulative cigarette pack-years (%)           |                                                |                                       |         |
| Never                                         | 54.4                                           | 53.8 <sup>12</sup>                    | 0.440   |
| <20                                           | 33.2                                           | 31.2                                  |         |
| ≥20                                           | 12.4                                           | 15.0                                  |         |
| Current hypertension (%)                      | 23.5                                           | 25.2 <sup>13</sup>                    | 0.355   |
| Current diabetes mellitus (%)                 | 4.5                                            | 6.3 <sup>11</sup>                     | 0.049   |

Continuous variables: survey t-test

Categorical variables: 2\*2 table or 2\*C table : survey X\_square (Rao-Scott Chi-Square Test)

<sup>1</sup> Subjects (N=3608) are eligible for the audiometric data

<sup>2</sup> Participants (N=2592) are the individuals having all interest variables in this study: hearing thresholds, nutrient intake, age, BMI, sex, race/ethnicity, ototoxic medication, cumulative cigarette pack-years, hypertension, diabetes, occupation, recreation and firearm noise.

<sup>3</sup> PTA at speech frequencies (Pure tone means at 0.5, 1, 2, 4 KHz)

<sup>4</sup> Four-year weighted mean (± SE) (all such values)

<sup>5</sup> PTA at high frequencies (Pure tone means at 3, 4, 6 kHz)

Non-Participants (N=951<sup>6</sup>, 790<sup>8</sup>, 1013<sup>10</sup>, 1015<sup>11</sup>, 698<sup>12</sup>, 843<sup>13</sup>, and 1016 for the others) are the individuals having the variable to be compared

<sup>7</sup> Occupation noise (1 < O\*NET noise scale < 5)

<sup>9</sup> Weighted percentages (all such values)

**Supplemental Table 2.** Multivariate-adjusted<sup>1</sup> percent change (95% CIs) of hearing thresholds (dB) by dietary (food) intake quartiles (Q).

|                                       | Q 1     | Q 2                    | Q 3                    | Q 4                    | <i>p-Trend</i> |
|---------------------------------------|---------|------------------------|------------------------|------------------------|----------------|
| <b>A. Speech frequencies (n=2543)</b> |         |                        |                        |                        |                |
| $\beta$ -Carotene <sup>2</sup>        | 0 (Ref) | -8.68 (-16.48, -0.16)  | -12.94 (-19.78, -5.53) | -14.27 (-20.99, -6.98) | <0.001         |
| Vitamin C <sup>3</sup>                | 0 (Ref) | -6.70 (-13.71, 0.89)   | -7.19 (-15.85, 2.37)   | -6.32 (-13.64, 1.62)   | 0.165          |
| Vitamin E <sup>4</sup>                | 0 (Ref) | 5.51 (-3.02, 14.80)    | 8.90 (-2.81, 22.01)    | 3.66 (-5.07, 13.19)    | 0.399          |
| Magnesium <sup>5</sup>                | 0 (Ref) | -9.63 (-17.02, -1.59)  | -9.89 (-19.07, 0.34)   | -8.15 (-18.37, 3.34)   | 0.208          |
| AC1 <sup>6</sup>                      | 0 (Ref) | -12.89 (-19.87, -5.30) | -14.88 (-21.80, -7.35) | -12.64 (-19.25, -5.48) | 0.002          |
| AC2 <sup>7</sup>                      | 0 (Ref) | -7.30 (-16.71, 3.18)   | -6.72 (-13.73, 0.86)   | -7.00 (-15.88, 2.80)   | 0.166          |
| <b>B. High frequencies (n=2535)</b>   |         |                        |                        |                        |                |
| $\beta$ -Carotene <sup>2</sup>        | 0 (Ref) | -2.66 (-11.26, 6.77)   | -9.70 (-16.23, -2.66)  | -14.41 (-20.77, -7.53) | <0.001         |
| Vitamin C <sup>3</sup>                | 0 (Ref) | -4.25 (-12.44, 4.71)   | -3.34 (-12.34, 6.59)   | -7.38 (-14.28, 0.08)   | 0.096          |
| Vitamin E <sup>4</sup>                | 0 (Ref) | 6.06 (-2.61, 15.49)    | 7.52 (-4.51, 21.06)    | 2.97 (-6.19, 13.04)    | 0.533          |
| Magnesium <sup>5</sup>                | 0 (Ref) | -8.12 (-16.72, 1.37)   | -11.46 (-20.59, -1.27) | -10.15 (-18.26, -1.24) | 0.036          |
| AC1 <sup>6</sup>                      | 0 (Ref) | -6.00 (-13.58, 2.24)   | -11.23 (-19.32, -2.33) | -13.64 (-19.19, -7.71) | <0.001         |
| AC2 <sup>7</sup>                      | 0 (Ref) | -8.82 (-16.49, -0.45)  | -3.72 (-11.59, 4.85)   | -10.55 (-18.06, -2.36) | 0.043          |

Q, quartile (~25<sup>th</sup>%; ~median; ~75<sup>th</sup> %; ~100<sup>th</sup> %). Q1 is the reference.

<sup>1</sup>Adjusted for age, age<sup>2</sup>, sex, race/ethnicity, BMI, ototoxic medication, pack-years of cigarette smoke, hypertension, diabetes, and occupation, recreation and firearm noise

<sup>2</sup> $\beta$ -Carotene Quartiles cut-off points: 375.6, 770, 2024  $\mu$ g/day

<sup>3</sup>Vitamin C Quartiles cut-off points: 33.65, 65.6, 136 mg/day

<sup>4</sup>Vitamin E Quartiles cut-off points: 0.238, 2.865, 6.3 mg/day

<sup>5</sup>Magnesium Quartiles cut-off points: 221.55, 270.8, 329.4mg/day

<sup>6</sup>Antioxidant composite 1:  $\beta$ -carotene + Vitamin C (0<nutritional score<200); quartiles cut-off points: 63.75, 101.9, 138.15

<sup>7</sup>Antioxidant composite 2:  $\beta$ -carotene + Vitamin C + Vitamin E (0< nutritional score<300); quartiles cut-off points: 106.30, 152.55, 193.5

**Supplemental Table 3.** Multivariate-adjusted<sup>1</sup> percent change (95% CIs) of hearing thresholds (dB) at differently defined frequencies by total nutrient intake quartiles (Q).

|                                                        | Q 1     | Q 2                    | Q 3                    | Q 4                    | <i>p-Trend</i> |
|--------------------------------------------------------|---------|------------------------|------------------------|------------------------|----------------|
| <b>A. Speech frequencies at 0.5, 1, 2 kHz (n=2472)</b> |         |                        |                        |                        |                |
| $\beta$ -Carotene <sup>2</sup>                         | 0 (Ref) | -7.63 (-15.50, 0.97)   | -9.97 (-17.14, -2.19)  | -14.23 (-20.32, -7.67) | <0.001         |
| Vitamin C <sup>3</sup>                                 | 0 (Ref) | -7.26 (-15.55, 1.84)   | -11.04 (-17.36, -4.24) | -11.28 (-18.81, -3.06) | 0.007          |
| Vitamin E <sup>4</sup>                                 | 0 (Ref) | 5.17 (-6.07, 17.75)    | 0.91 (-8.08, 10.79)    | -6.37 (-14.00, 1.94)   | 0.057          |
| Magnesium <sup>5</sup>                                 | 0 (Ref) | -10.10 (-18.26, -1.12) | -9.45 (-17.39, -0.76)  | -13.43 (-20.81, -5.36) | 0.007          |
| AC1 <sup>6</sup>                                       | 0 (Ref) | -6.37 (-12.78, 0.52)   | -14.50 (-21.36, -7.05) | -13.90 (-19.83, -7.54) | <0.001         |
| AC2 <sup>7</sup>                                       | 0 (Ref) | -5.24 (-13.94, 4.34)   | -12.90 (-20.43, -4.66) | -12.52 (-18.78, -5.79) | <0.001         |
| <b>B. High frequencies at 3, 4, 6, 8 kHz (n=2239)</b>  |         |                        |                        |                        |                |
| $\beta$ -Carotene <sup>2</sup>                         | 0 (Ref) | -5.53 (-14.00, 3.78)   | -12.63 (-20.02, -4.56) | -16.48 (-22.78, -9.66) | <0.001         |
| Vitamin C <sup>3</sup>                                 | 0 (Ref) | -3.17 (-12.39, 7.01)   | -4.15 (-9.96, 2.03)    | -10.01 (-17.42, -1.94) | 0.010          |
| Vitamin E <sup>4</sup>                                 | 0 (Ref) | 10.31 (-2.46, 24.75)   | 7.25 (-1.33, 16.58)    | -4.52 (-14.17, 6.23)   | 0.330          |
| Magnesium <sup>5</sup>                                 | 0 (Ref) | -15.11 (-24.63, -4.39) | -10.50 (-16.38, -4.21) | -14.56 (-22.44, -5.89) | 0.007          |
| AC1 <sup>6</sup>                                       | 0 (Ref) | -6.33 (-14.68, 2.83)   | -9.77 (-17.62, -1.17)  | -14.35 (-19.60, -8.76) | <0.001         |
| AC2 <sup>7</sup>                                       | 0 (Ref) | -5.82 (-13.90, 3.03)   | -8.93 (-16.30, -0.91)  | -13.48 (-20.10, -6.32) | 0.002          |

Q, quartile (~25<sup>th</sup>%; ~median; ~75<sup>th</sup>%; ~100<sup>th</sup> %). Q1 is the reference.

Speech frequencies (speech-PTA at 0.5, 1, 2 kHz)

High frequencies (high-PTA at 3, 4, 6, 8 kHz)

<sup>1</sup> Adjusted for age, age<sup>2</sup>, sex, race/ethnicity, BMI, ototoxic medication, pack-years of cigarette smoke, hypertension, diabetes, and occupation, recreation and firearm noise

<sup>2</sup>  $\beta$ -Carotene Quartiles cut-off points: 375.63, 771, 2034  $\mu$ g/day

<sup>3</sup> Vitamin C Quartiles cut-off points: 44.623, 107, 213.5mg/day

<sup>4</sup> Vitamin E Quartiles cut-off points: 0.944, 6.444, 22.2 mg/day

<sup>5</sup> Magnesium Quartiles cut-off points: 233.49, 294.75, 374.45mg/day

<sup>6</sup> Antioxidant composite 1:  $\beta$ -carotene + Vitamin C (0<nutritional score<200); quartiles cut-off points: 66.3, 101, 137.2

<sup>7</sup> Antioxidant composite 2:  $\beta$ -carotene + Vitamin C + Vitamin E (0< nutritional score<300); ; quartile cut-off points: 101.2, 150.6, 200.3

**Supplemental Table 4.** Percent change (95% CIs) of hearing thresholds (dB) by contribution of different variables (n=2535)

A. Combined effect of  $\beta$ -carotene and Magnesium

| Variables                                               | No.  | Regression model <sup>1</sup> |
|---------------------------------------------------------|------|-------------------------------|
| $\beta$ -carotene and Mg intake                         |      |                               |
| Low $\beta$ -carotene, Low Mg                           | 805  | 0 (Reference)                 |
| Low $\beta$ -carotene, High Mg                          | 464  | -7.87 (-14.94, -0.21)         |
| High $\beta$ -carotene, Low Mg                          | 503  | -9.32 (-16.74, -1.23)         |
| High $\beta$ -carotene, High Mg                         | 763  | -14.21 (-20.26, -7.71)        |
| O*NET Noise at longest job ( <i>unit score change</i> ) |      | 19.74 (12.69, 27.23)          |
| Age ( <i>unit year change</i> )                         |      | 3.38 (1.56, 5.22)             |
| Age <sup>2</sup> ( <i>unit year change</i> )            |      | 0.00 (-0.01, 0.02)            |
| Body mass index ( <i>unit kg/m<sup>2</sup> change</i> ) |      | 0.77 (0.26, 1.27)             |
| Sex                                                     |      |                               |
| Male                                                    | 1186 | 0 (Reference)                 |
| Female                                                  | 1349 | -25.92 (-30.75, -20.76)       |
| Race ethnicity                                          |      |                               |
| Non-Hispanic White                                      | 1284 | 0 (Reference)                 |
| Non-Hispanic Black                                      | 549  | -15.35 (-22.18, -7.91)        |
| Mexican American                                        | 510  | 1.87 (-7.57, 12.27)           |
| Other                                                   | 192  | 3.51 (-6.93, 15.13)           |
| Ototoxic medication                                     |      |                               |
| No                                                      | 2163 | 0 (Reference)                 |
| Yes                                                     | 372  | 0.59 (-9.57, 11.89)           |
| Cumulative cigarette packyears                          |      |                               |
| Never                                                   | 1431 | 0 (Reference)                 |
| <20                                                     | 812  | 12.46 (5.08, 20.36)           |
| $\geq 20$                                               | 292  | 17.85 (7.50, 29.21)           |
| Current diagnosis of hypertension                       |      |                               |
| No                                                      | 1830 | 0 (Reference)                 |
| Yes                                                     | 705  | 4.79 (-0.72, 10.61)           |
| Current diagnosis of diabetes mellitus                  |      |                               |
| No                                                      | 2376 | 0 (Reference)                 |
| Yes                                                     | 159  | 10.65 (-3.27, 26.56)          |
| Noise Exposure at firearm                               |      |                               |
| No                                                      | 2367 | 0 (Reference)                 |
| Yes                                                     | 168  | 21.16 (9.70, 33.83)           |
| Noise Exposure at recreation                            |      |                               |
| No                                                      | 1910 | 0 (Reference)                 |
| Yes                                                     | 625  | 5.43 (-2.84, 14.40)           |

**Supplemental Table 4 (Continued)****A. Combined effect of vitamin C and Magnesium**

| Variables                                               | No.  | Regression model <sup>1</sup> |
|---------------------------------------------------------|------|-------------------------------|
| Vitamin C and Mg intake                                 |      |                               |
| Low Vitamin C, Low Mg                                   | 692  | 0 (Reference)                 |
| Low Vitamin C, High Mg                                  | 228  | 2.13 (-8.49, 13.97)           |
| High Vitamin C, Low Mg                                  | 616  | -1.33 (-9.37, 7.42)           |
| High Vitamin C, High Mg                                 | 999  | -10.72 (-16.57, -4.45)        |
| O*NET Noise at longest job ( <i>unit score change</i> ) |      | 20.50 (13.33, 28.11)          |
| Age ( <i>unit year change</i> )                         |      | 3.36 (1.57, 5.18)             |
| Age <sup>2</sup> ( <i>unit year change</i> )            |      | 0.00 (-0.01, 0.02)            |
| Body mass index ( <i>unit kg/m<sup>2</sup> change</i> ) |      | 0.75 (0.24, 1.26)             |
| Sex                                                     |      |                               |
| Male                                                    | 1186 | 0 (Reference)                 |
| Female                                                  | 1349 | -25.74 (-30.72, -20.39)       |
| Race ethnicity                                          |      |                               |
| Non-Hispanic White                                      | 1284 | 0 (Reference)                 |
| Non-Hispanic Black                                      | 549  | -15.46 (-22.38, -7.93)        |
| Mexican American                                        | 510  | 0.96 (-8.53, 11.43)           |
| Other                                                   | 192  | 2.75 (-7.43, 14.04)           |
| Ototoxic medication                                     |      |                               |
| No                                                      | 2163 | 0 (Reference)                 |
| Yes                                                     | 372  | 0.38 (-9.75, 11.66)           |
| Cumulative cigarette packyears                          |      |                               |
| Never                                                   | 1431 | 0 (Reference)                 |
| <20                                                     | 812  | 12.20 (4.62, 20.33)           |
| ≥20                                                     | 292  | 18.04 (7.21, 29.95)           |
| Current diagnosis of hypertension                       |      |                               |
| No                                                      | 1830 | 0 (Reference)                 |
| Yes                                                     | 705  | 5.25 (-0.43, 11.25)           |
| Current diagnosis of diabetes mellitus                  |      |                               |
| No                                                      | 2376 | 0 (Reference)                 |
| Yes                                                     | 159  | 11.00 (-2.51, 26.37)          |
| Noise Exposure at firearm                               |      |                               |
| No                                                      | 2367 | 0 (Reference)                 |
| Yes                                                     | 168  | 20.91 (9.33, 33.72)           |
| Noise Exposure at recreation                            |      |                               |
| No                                                      | 1910 | 0 (Reference)                 |
| Yes                                                     | 625  | 5.71 (-2.55, 14.66)           |

<sup>1</sup>Multivariate models defined in Table 5 were used.

## Supplemental References

1. Lane JS, Magno CP, Lane KT, Chan T, Hoyt DB, Greenfield S. Nutrition impacts the prevalence of peripheral arterial disease in the United States. *J Vasc Surg.* 2008;48:897-904.
2. *NHANES 2001-2002 Data Documentation, Codebook, and Frequencies: Dietary Interview (Total Nutrients Intakes)*. Hyattsville, MD: National Center for Health Statistics, The Centers for Disease Control and Prevention;2010.
3. *NHANES 2003-2004 Data Documentation, Codebook, and Frequencies: Dietary Interview (Total Nutrients, First Day )*. Hyattsville, MD: National Center for Health Statistics, The Centers for Disease Control and Prevention;2007.
4. Botman SL, Moore TF, Moriarity CL, Parsons VL. *Design and estimation for the National Health Interview Survey, 1995-2004*. Hyattsville, MD: National Center for Health Statistics, Centers for Disease Control and Prevention;2000.
5. Blanton CA, Moshfegh AJ, Baer DJ, Kretsch MJ. The USDA automated multiple-pass method accurately estimates group total energy and nutrient intake. *J Nutr.* 2006;136:2594-2599.
6. Willett W. Issues in Analysis and Presentation of Dietary Data. *Nutritional Epidemiology.* 1998;1:321-347.
7. *NHANES 2001-2002 Data Documentation, Codebook, and Frequencies: Dietary Supplements Questionnaire Data (DSQDOC\_B)*. Hyattsville, MD: National Center for Health Statistics, The Centers for Disease Control and Prevention;2007.
8. *NHANES 2003 - 2004 Data Documentation, Codebook, and Frequencies: Dietary Supplements Questionnaire Data (DSQDOC\_C)*. Hyattsville, MD: National Center for Health Statistics, The Centers for Disease Control and Prevention;2007.
9. *1999 - 2010 Data Documentation, Codebook, and Frequencies : Dietary Supplement Database (DSDDOC)*. Hyattsville, MD: National Center for Health Statistics, The Centers for Disease Control and Prevention;2012.
10. NHANES Dietary Web Tutorial. 2010; <http://www.cdc.gov/nchs/tutorials/Dietary/index.htm>. Accessed March 9, 2013.
